# Supplementary material
Source: PubMed Central journal article supplement (PMC4040559)
Supplement: 1323641111_pnas.201323641SI.pdf [file 1323641111_pnas.201323641SI.pdf]

# Supporting Information

Copeland et al. 10.1073/pnas.1323641111

**Table S1. Associations between CRP and bullying involvement within childhood/adolescence (ages 9–16; parent report)**

| Bully status  | Simple             |             |                 | Adjusted for CRP-related covariates |          |                                | Adjusted for bullying-related covariates |             |                                              |
|---------------|--------------------|-------------|-----------------|-------------------------------------|----------|--------------------------------|------------------------------------------|-------------|----------------------------------------------|
|               | $\beta$ (SE)       | <i>P</i>    | Sig. covariates | $\beta$ (SE)                        | <i>P</i> | Sig. covariates                | $\beta$ (SE)                             | <i>P</i>    | Sig. covariates                              |
| Recent status |                    |             |                 |                                     |          |                                |                                          |             |                                              |
| Bully         | 0.06 (0.05)        | 0.23        | Prior CRP       | 0.03 (0.05)                         | 0.58     | Prior CRP, race, BMI, med. use | 0.05 (0.05)                              | 0.27        | Prior CRP, race, family dysfunction          |
| Victim        | 0.01 (0.02)        | 0.70        | Prior CRP       | 0.01 (0.02)                         | 0.92     | Prior CRP, race, BMI, med. use | 0.02 (0.02)                              | 0.41        | Prior CRP, race, family dysfunction          |
| Bully–victim  | 0.08 (0.09)        | 0.36        | Prior CRP       | 0.00 (0.08)                         | 0.97     | Prior CRP, race, BMI, med. use | 0.08 (0.09)                              | 0.37        | Prior CRP, race, family dysfunction          |
| Cumulative    |                    |             |                 |                                     |          |                                |                                          |             |                                              |
| Bully         | 0.03 (0.02)        | 0.12        | Prior CRP       | 0.02 (0.02)                         | 0.14     | Prior CRP, BMI, med. use       | 0.01 (0.02)                              | 0.43        | Prior CRP, race, anxiety, family dysfunction |
| Victim        | <b>0.03 (0.01)</b> | <b>0.02</b> | Prior CRP       | 0.01 (0.01)                         | 0.25     | Prior CRP, BMI, med. use       | <b>0.03 (0.01)</b>                       | <b>0.01</b> | Prior CRP, race, anxiety, family dysfunction |
| Bully–victim  | 0.05 (0.03)        | 0.13        | Prior CRP       | 0.02 (0.03)                         | 0.52     | Prior CRP, BMI, med. use       | 0.04 (0.03)                              | 0.20        | Prior CRP, race, anxiety, family dysfunction |

All models were tested using weighted linear regression. Simple models include current status on the bullying variables and status of C-reactive protein (CRP) at the prior observation. CRP-related covariates also included the following: sex, age, time since last interview, body mass index (BMI), recent nicotine use, recent alcohol use, recent drug use, recent medication use, health ailments, and low socioeconomic status (SES). Bullying-related covariates include sex, low SES, family instability, family dysfunction, maltreatment, depressive disorders, anxiety disorders, disruptive behavior disorders, or substance disorders. Boldface refers to findings significant at  $P < 0.05$ .

**Table S2. Associations between CRP and bullying involvement within childhood/adolescence (ages 9–16; child report)**

| Bully status  | Simple              |                  |                 | Adjusted for CRP-related covariates |             |                                | Adjusted for bullying-related covariates |             |                                              |
|---------------|---------------------|------------------|-----------------|-------------------------------------|-------------|--------------------------------|------------------------------------------|-------------|----------------------------------------------|
|               | $\beta$ (SE)        | <i>P</i>         | Sig. covariates | $\beta$ (SE)                        | <i>p</i>    | Sig. covariates                | $\beta$ (SE)                             | <i>p</i>    | Sig. covariates                              |
| Recent status |                     |                  |                 |                                     |             |                                |                                          |             |                                              |
| Bully         | 0.10 (0.09)         | 0.23             | Prior CRP       | 0.09 (0.08)                         | 0.27        | Prior CRP, race, BMI, med. use | 0.10 (0.10)                              | 0.32        | Prior CRP, race, family dysfunction          |
| Victim        | 0.06 (0.03)         | 0.06             | Prior CRP       | 0.06 (0.03)                         | 0.07        | Prior CRP, race, BMI, med. use | <b>0.07 (0.03)</b>                       | <b>0.04</b> | Prior CRP, race, family dysfunction          |
| Bully–victim  | <b>−0.05 (0.01)</b> | <b>&lt;0.001</b> | Prior CRP       | −0.04 (0.02)                        | 0.06        | Prior CRP, race, BMI, med. use | −0.06 (0.03)                             | 0.07        | Prior CRP, race, family dysfunction          |
| Cumulative    |                     |                  |                 |                                     |             |                                |                                          |             |                                              |
| Bully         | −0.01 (0.03)        | 0.75             | Prior CRP       | −0.03 (0.02)                        | 0.23        | Prior CRP, BMI, med. use       | −0.02 (0.03)                             | 0.43        | Prior CRP, race, anxiety, family dysfunction |
| Victim        | 0.02 (0.01)         | 0.06             | Prior CRP       | <b>0.02 (0.01)</b>                  | <b>0.04</b> | Prior CRP, BMI, med. use       | 0.02 (0.01)                              | 0.06        | Prior CRP, race, anxiety, family dysfunction |
| Bully–victim  | −0.01 (0.05)        | 0.89             | Prior CRP       | −0.01 (0.04)                        | 0.91        | Prior CRP, BMI, med. use       | −0.02 (0.05)                             | 0.78        | Prior CRP, race, anxiety, family dysfunction |

All models were tested using weighted linear regression. Simple models include current status on the bullying variables and status of C-reactive protein (CRP) at the prior observation. CRP-related covariates also included the following: sex, age, time since last interview, body mass index (BMI), recent nicotine use, recent alcohol use, recent drug use, recent medication use, health ailments, and low socioeconomic status (SES). Bullying-related covariates include sex, low SES, family instability, family dysfunction, maltreatment, depressive disorders, anxiety disorders, disruptive behavior disorders, or substance disorders. Boldface refers to findings significant at  $P < 0.05$ .

**Table S3. Associations between childhood bullying involvement and adult CRP levels (ages 19 and 21; parent report)**

| Bully status     | Simple              |                  |                 | Adjusted for CRP-related covariates |                  |                                     | Adjusted for bullying-related covariates |                  |                           |
|------------------|---------------------|------------------|-----------------|-------------------------------------|------------------|-------------------------------------|------------------------------------------|------------------|---------------------------|
|                  | $\beta$ (SE)        | <i>P</i>         | Sig. covariates | $\beta$ (SE)                        | <i>P</i>         | Sig. covariates                     | $\beta$ (SE)                             | <i>P</i>         | Sig. covariates           |
| Childhood status |                     |                  |                 |                                     |                  |                                     |                                          |                  |                           |
| Bully            | <b>-0.16 (0.04)</b> | <b>0.04</b>      | Prior CRP       | <b>-0.14 (0.03)</b>                 | <b>&lt;0.001</b> | Prior CRP, sex, race, BMI, med. use | <b>-0.16 (0.05)</b>                      | <b>&lt;0.001</b> | Prior CRP, sex, race, SES |
| Victim           | 0.02 (0.05)         | 0.71             | Prior CRP       | 0.02 (0.04)                         | 0.64             | Prior CRP, sex, race, BMI, med. use | 0.02 (0.04)                              | 0.68             | Prior CRP, sex, race, SES |
| Bully-victim     | <b>0.11 (0.05)</b>  | <b>0.02</b>      | Prior CRP       | 0.03 (0.06)                         | 0.62             | Prior CRP, sex, race, BMI, med. use | 0.10 (0.05)                              | 0.09             | Prior CRP, sex, race, SES |
| Cumulative       |                     |                  |                 |                                     |                  |                                     |                                          |                  |                           |
| Bully            | <b>-0.12 (0.03)</b> | <b>&lt;0.001</b> | Prior CRP       | <b>-0.10 (0.03)</b>                 | <b>&lt;0.001</b> | Prior CRP, sex, race, BMI, med. use | <b>-0.12 (0.03)</b>                      | <b>&lt;0.001</b> | Prior CRP, sex, race, SES |
| Victim           | 0.02 (0.03)         | 0.57             | Prior CRP       | 0.01 (0.02)                         | 0.52             | Prior CRP, sex, race, BMI, med. use | 0.02 (0.02)                              | 0.44             | Prior CRP, sex, race, SES |
| Bully-victim     | <b>0.07 (0.03)</b>  | <b>0.02</b>      | Prior CRP       | 0.03 (0.03)                         | 0.40             | Prior CRP, sex, race, BMI, med. use | 0.06 (0.04)                              | 0.16             | Prior CRP, sex, race, SES |

All models were tested by using weighted linear regression. Simple models include current status on the bullying variables and status of C-reactive protein (CRP) at the prior observation. CRP-related covariates include the following: sex, age, time since last interview, body mass index (BMI), recent nicotine use, recent alcohol use, recent drug use, recent medication use, health ailments, and low socioeconomic status (SES). Bullying-related covariates controlled for childhood/adolescent covariates of bullying status. These included sex, low SES, family instability, family dysfunction, maltreatment, depressive disorders, anxiety disorders, disruptive behavior disorders, or substance disorders. Boldface refers to findings significant at  $P < 0.05$ .

**Table S4. Associations between childhood bullying involvement and adult CRP levels (ages 19 and 21; child report)**

| Bully status     | Simple       |          |                 | Adjusted for CRP-related covariates |          |                                     | Adjusted for bullying-related covariates |             |                                               |
|------------------|--------------|----------|-----------------|-------------------------------------|----------|-------------------------------------|------------------------------------------|-------------|-----------------------------------------------|
|                  | $\beta$ (SE) | <i>P</i> | Sig. covariates | $\beta$ (SE)                        | <i>P</i> | Sig. covariates                     | $\beta$ (SE)                             | <i>P</i>    | Sig. covariates                               |
| Childhood status |              |          |                 |                                     |          |                                     |                                          |             |                                               |
| Bully            | -0.07 (0.08) | 0.86     | Prior CRP       | -0.03 (0.06)                        | 0.58     | Prior CRP, sex, race, BMI, med. use | -0.01 (0.06)                             | 0.98        | Prior CRP, sex, race, SES, family dysfunction |
| Victim           | 0.07 (0.04)  | 0.10     | Prior CRP       | 0.07 (0.05)                         | 0.14     | Prior CRP, sex, race, BMI, med. use | <b>0.08 (0.03)</b>                       | <b>0.03</b> | Prior CRP, sex, race, SES, family dysfunction |
| Bully-victim     | -0.01 (0.08) | 0.43     | Prior CRP       | -0.11 (0.08)                        | 0.12     | Prior CRP, sex, race, BMI, med. use | -0.06 (0.07)                             | 0.48        | Prior CRP, sex, race, SES, family dysfunction |
| Cumulative       |              |          |                 |                                     |          |                                     |                                          |             |                                               |
| Bully            | -0.04 (0.06) | 0.62     | Prior CRP       | -0.03 (0.05)                        | 0.57     | Prior CRP, sex, race, BMI, med. use | -0.01 (0.04)                             | 0.92        | Prior CRP, sex, race, poverty, dysfunction    |
| Victim           | 0.06 (0.04)  | 0.13     | Prior CRP       | 0.07 (0.04)                         | 0.10     | Prior CRP, sex, race, BMI, med. use | <b>0.07 (0.03)</b>                       | <b>0.02</b> | Prior CRP, sex, race, poverty, dysfunction    |
| Bully-victim     | -0.02 (0.05) | 0.76     | Prior CRP       | -0.07 (0.05)                        | 0.12     | Prior CRP, sex, race, BMI, med. use | -0.04 (0.03)                             | 0.28        | Prior CRP, sex, race, poverty, dysfunction    |

All models were tested by using weighted linear regression. Simple models include current status on the bullying variables and status of C-reactive protein (CRP) at the prior observation. CRP-related covariates include the following: sex, age, time since last interview, body mass index (BMI), recent nicotine use, recent alcohol use, recent drug use, recent medication use, health ailments, and low socioeconomic status (SES). Bullying-related covariates controlled for childhood/adolescent covariates of bullying status. These included sex, low SES, family instability, family dysfunction, maltreatment, depressive disorders, anxiety disorders, disruptive behavior disorders, or substance disorders. Boldface refers to findings significant at  $P < 0.05$ .

**Table S5. Associations between childhood bullying involvement and adult CRP levels by age (ages 19 and 21)**

| Ages, y      | Simple              |             |                 | Adjusted for CRP-related covariates |              |                                     | Adjusted for bullying-related covariates |             |                                               |
|--------------|---------------------|-------------|-----------------|-------------------------------------|--------------|-------------------------------------|------------------------------------------|-------------|-----------------------------------------------|
|              | $\beta$ (SE)        | <i>P</i>    | Sig. covariates | $\beta$ (SE)                        | <i>P</i>     | Sig. covariates                     | $\beta$ (SE)                             | <i>P</i>    | Sig. covariates                               |
| 9–13         |                     |             |                 |                                     |              |                                     |                                          |             |                                               |
| Bully        | -0.08 (0.06)        | 0.28        | Prior CRP       | -0.07 (0.05)                        | 0.24         | Prior CRP, sex, race, BMI, med. use | -0.09 (0.06)                             | 0.19        | Prior CRP, sex, race, SES, family dysfunction |
| Victim       | 0.07 (0.04)         | 0.09        | Prior CRP       | <b>0.09 (0.04)</b>                  | <b>0.02</b>  | Prior CRP, sex, race, BMI, med. use | <b>0.08 (0.03)</b>                       | <b>0.01</b> | Prior CRP, sex, race, SES, family dysfunction |
| Bully-victim | -0.07 (0.07)        | 0.32        | Prior CRP       | -0.10 (0.06)                        | 0.09         | Prior CRP, sex, race, BMI, med. use | -0.08 (0.05)                             | 0.13        | Prior CRP, sex, race, SES, family dysfunction |
| 14–16        |                     |             |                 |                                     |              |                                     |                                          |             |                                               |
| Bully        | <b>-0.11 (0.05)</b> | <b>0.04</b> | Prior CRP       | <b>-0.10 (0.04)</b>                 | <b>0.006</b> | Prior CRP, sex, race, BMI, med. use | -0.05 (0.04)                             | 0.27        | Prior CRP, sex, race, poverty, dysfunction    |
| Victim       | 0.02 (0.05)         | 0.89        | Prior CRP       | 0.02 (0.04)                         | 0.61         | Prior CRP, sex, race, BMI, med. use | 0.02 (0.04)                              | 0.66        | Prior CRP, sex, race, poverty, dysfunction    |
| Bully-victim | 0.03 (0.07)         | 0.75        | Prior CRP       | -0.05 (0.06)                        | 0.40         | Prior CRP, sex, race, BMI, med. use | -0.02 (0.06)                             | 0.70        | Prior CRP, sex, race, poverty, dysfunction    |

All models were tested by using weighted linear regression. Simple models include current status on the bullying variables and status of C-reactive protein (CRP) at the prior observation. CRP-related covariates include the following: sex, age, time since last interview, body mass index (BMI), recent nicotine use, recent alcohol use, recent drug use, recent medication use, health ailments, and low socioeconomic (SES). Bullying-related covariates controlled for childhood/adolescent covariates of bullying status. These included sex, low SES, family instability, family dysfunction, maltreatment, depressive disorders, anxiety disorders, disruptive behavior disorders, or substance disorders.
